# Supplementary material for: Genotype-phenotype relationships of truncating mutations, p.E297G and p.D482G in bile salt export pump deficiency
Source: PubMed Central journal article supplement (PMC9852554; doi:10.1016/j.jhepr.2022.100626), 2022-11-16
Supplement: mmc1.pdf [file mmc1.pdf]

# **Genotype-phenotype relationships of truncating mutations, p.E297G and p.D482G in bile salt export pump deficiency**

Antonia Felzen, Daan B.E. van Wessel, Emmanuel Gonzales, Richard J. Thompson, Irena Jankowska, Benjamin L. Shneider, Etienne Sokal, Tassos Grammatikopoulos, Agustina Kadaristiana, Emmanuel Jacquemin, Anne Spraul, Patryk Lipiński, Piotr Czubkowski, Nathalie Rock, Mohammad Shagrani, Dieter Broering, Emanuele Nicastro, Deirdre Kelly, Gabriella Nebbia, Henrik Arnell, Björn Fischler, Jan B.F. Hulscher, Daniele Serranti, Cigdem Arikan, Esra Polat, Dominique Debray, Florence Lacaille, Cristina Goncalves, Loreto Hierro, Gema Muñoz Bartolo, Yael Mozer-Glassberg, Amer Azaz, Jernej Breclj, Antal Dezsófi, Pier Luigi Calvo, Enke Grabhorn, Steffen Hartleif, Wendy J. van der Woerd, Binita M. Kamath, Jian-She Wang, Liting Li, Özlem Durmaz, Nanda Kerkar, Marianne Hørby Jørgensen, Ryan Fischer, Carolina Jimenez-Rivera, Seema Alam, Mara Cananzi, Noemie Laverdure, Cristina Targa Ferreira, Felipe Ordoñez Guerrero, Heng Wang, Valerie Sency, Kyung Mo Kim, Huey-Ling Chen, Elisa de Carvalho, Alexandre Fabre, Jesus Quintero Bernabeu, Aglaia Zellos, Estella M. Alonso, Ronald J. Sokol, Frederick J. Suchy, Kathleen M. Loomes, Patrick J. McKiernan, Philip Rosenthal, Yumirle Turmelle, Simon Horslen, Kathleen Schwarz, Jorge A. Bezerra, Kasper Wang, Bettina E. Hansen, Henkjan J. Verkade, and the NATural course and Prognosis of PFIC and Effect of biliary Diversion (NAPPED) Consortium

## Table of contents

|                |    |
|----------------|----|
| Fig. S1.....   | 2  |
| Fig. S2 .....  | 3  |
| Fig. S3 .....  | 4  |
| Fig. S4 .....  | 5  |
| Fig. S5 .....  | 6  |
| Fig. S7 .....  | 8  |
| Table S1 ..... | 9  |
| Table S2 ..... | 10 |
| Table S3 ..... | 18 |

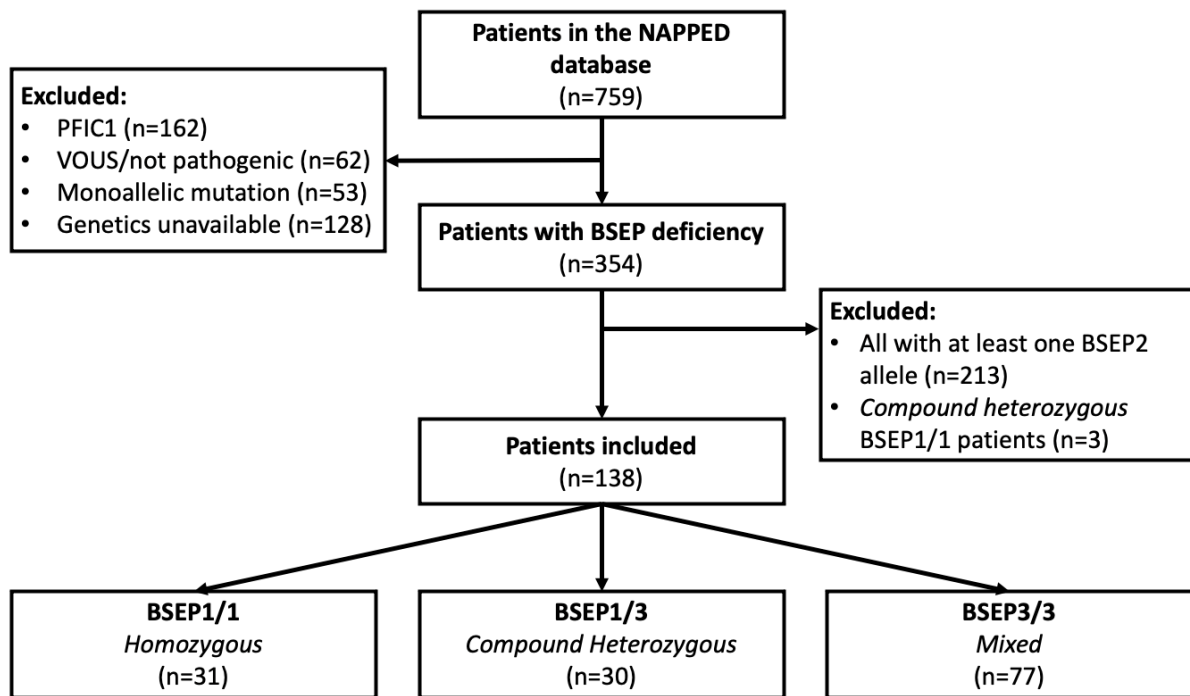

**Fig. S1. Extensive flowchart of patient inclusion from the NAPPED database.** Genotype category explained under methods section. *NAPPED*: *N*atural course and *P*rognosis of *P*haryngeal *F*amilial *I*nterstitial *C*holestasis *T*ype 1 (*F*IC1 deficiency); *PFIC1*: *P*rogressive *F*amilial *I*nterstitial *C*holestasis *T*ype 1 (*F*IC1 deficiency); *VOUS* (*v*ariant of *u*nknown *s*ignificance); *BSEP* (*b*ile salt *e*xport *p*ump).

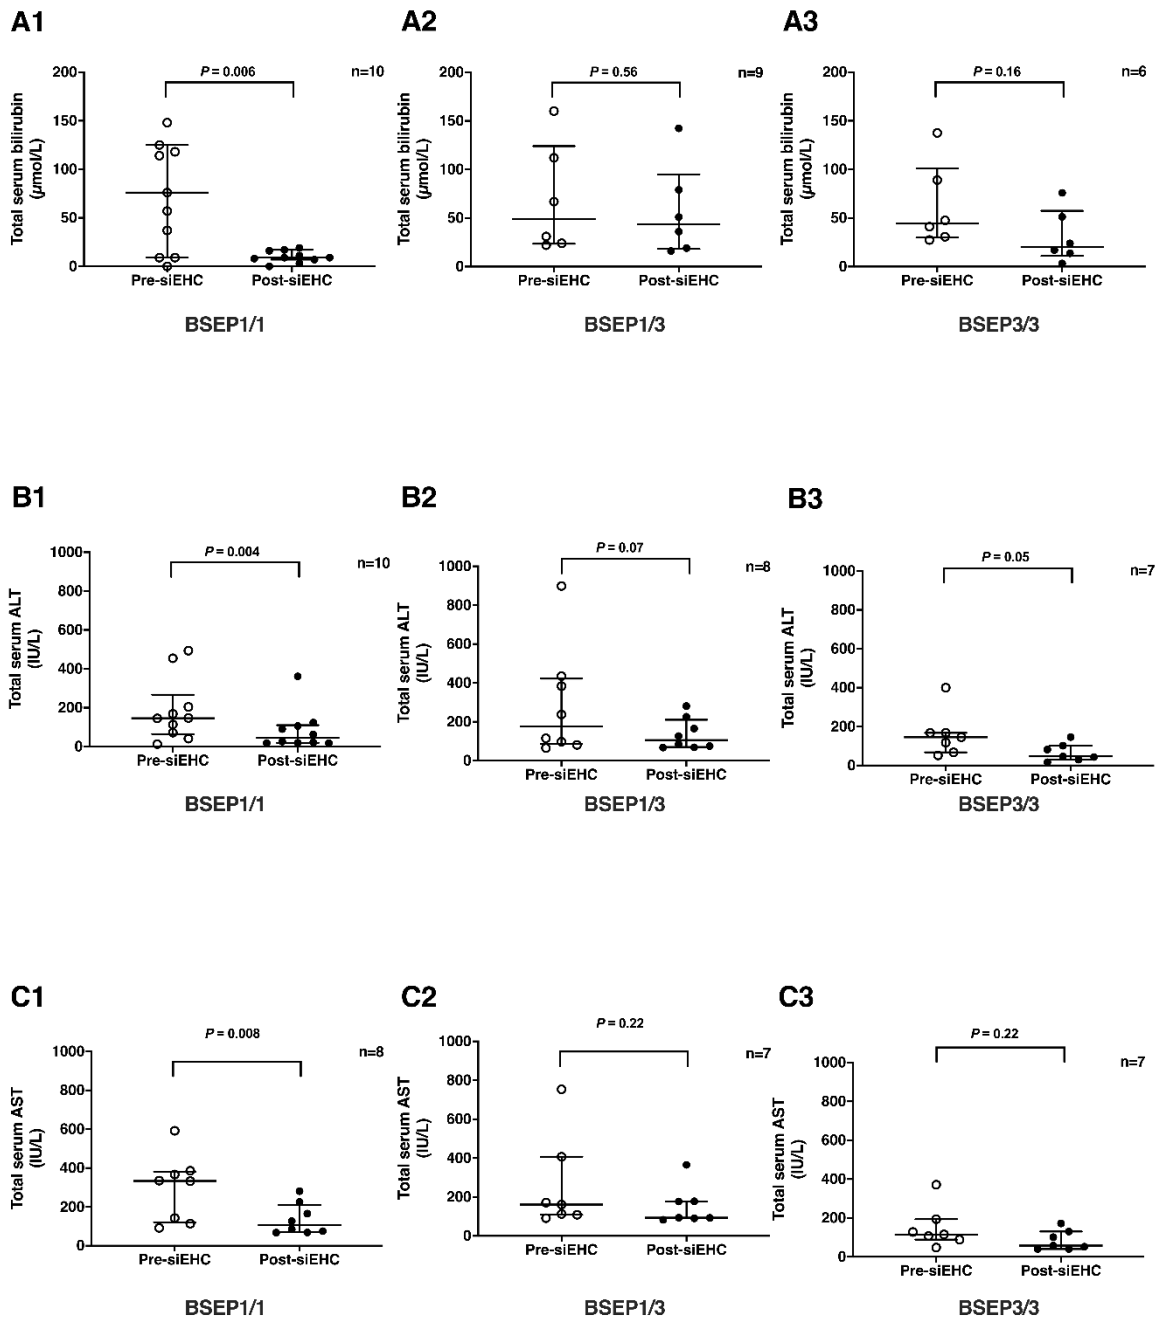

**Fig. S2. Serum liver biochemistry prior to (open symbols) and after (closed symbols) surgical biliary diversion.** In patients with a BSEP1/1, BSEP1/3 or BSEP3/3 genotype. Wilcoxon signed-rank test. Bars represent median and IQR. *BSEP* (bile salt export pump); *siEHC* (surgical interruption of the enterohepatic circulation).

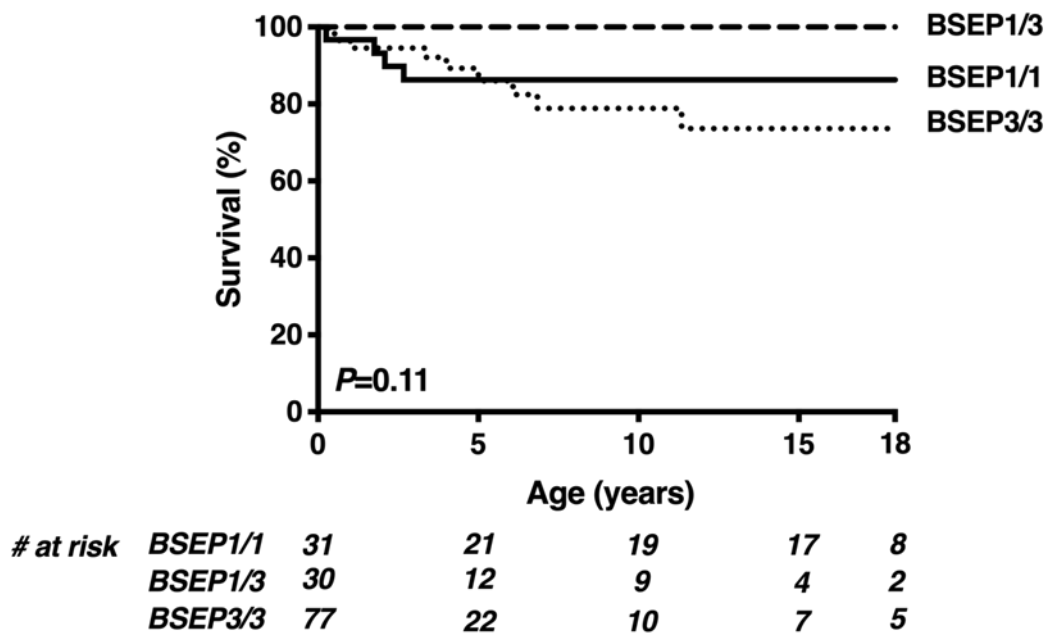

**Fig. S3. Observed total survival over time.** Genotypic categorization of BSEP1/1, BSEP1/3 and BSEP3/3 groups is defined in the methods section. Log-rank test. *BSEP* (bile salt export pump).

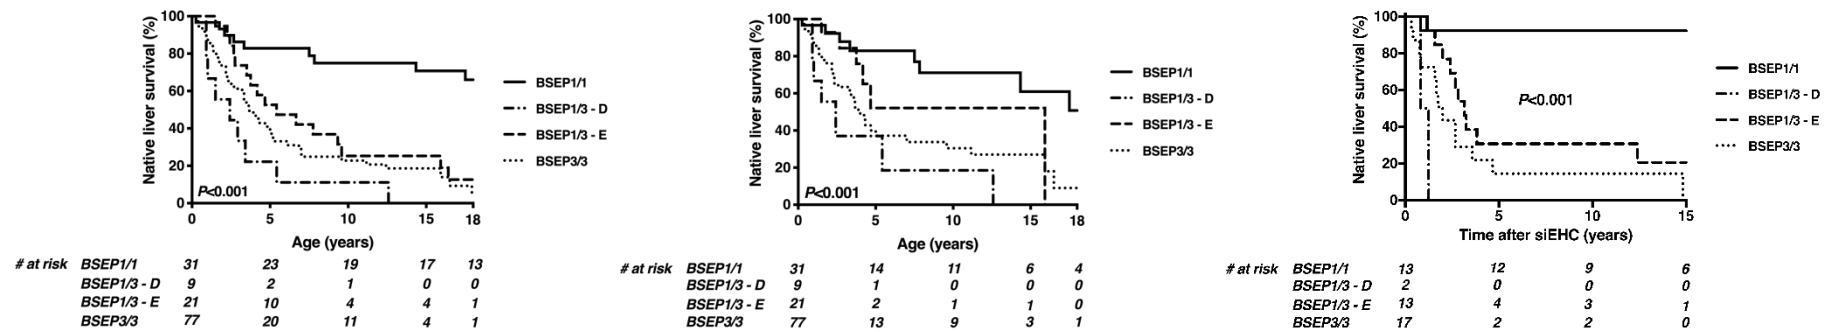

**Fig. S4. Observed native liver survival over time, specific for type of BSEP1 mutation in BSEP1/3 (p.E297G and p.D482G).**

*Left panel:* all patients; *middle panel:* patients without siEHC during follow up, patients with siEHC are censored at time of siEHC; *right panel:* patients after siEHC. Genotypic categorization of BSEP1/1, BSEP1/3 and BSEP3/3 groups is defined in the methods section; BSEP1/3-D: patients in the BSEP1/3 group with a p.D482G-PPTM combination; BSEP1/3-E: patients in the BSEP1/3 group with a p.E297G-PPTM combination. BSEP (*bile salt export pump*); siEHC (*surgical interruption of the enterohepatic circulation*).

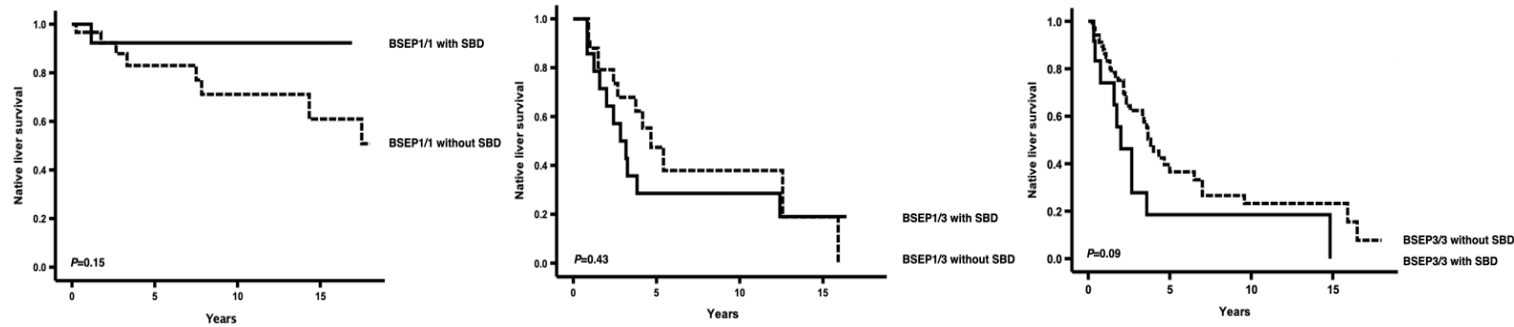

**Fig. S5. Observed native liver survival over time with clock reset approach.** *Left panel:* patients with a BSEP1/1 genotype; *middle panel:* patients with a BSEP1/3 genotype; *right panel:* patients with a BSEP3/3 genotype. Genotypic categorization of BSEP1/1, BSEP1/3 and BSEP3/3 groups is defined in the methods section. For patients without siEHC/**SBD** the x-axis is defined as age in years and patients with siEHC/**SBD** are censored in the plot. For patients with siEHC/**SBD** the x-axis is defined as time from diversion in years. *BSEP (bile salt export pump); SBD (surgical biliary diversion); siEHC (surgical interruption of the enterohepatic circulation).* Clock reset and competing risk approach.

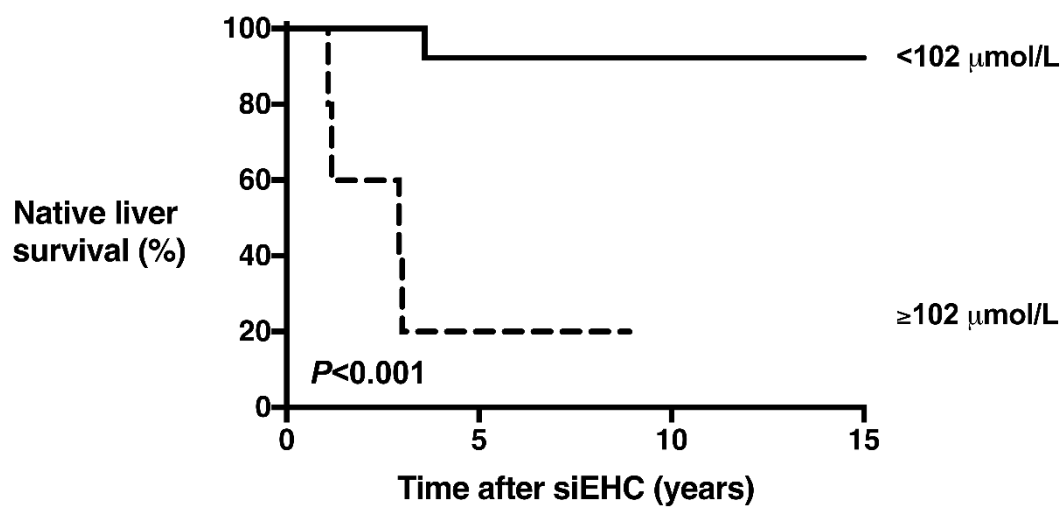

| # at risk | <102 $\mu\text{mol/L}$     | 13 | 12 | 9 | 6 |
|-----------|----------------------------|----|----|---|---|
|           | $\geq 102 \mu\text{mol/L}$ | 7  | 1  | 0 | 0 |

**Fig. S6. Native liver survival according to 102 $\mu\text{mol/L}$  cutoff after siEHC.** In patients with a post-surgical serum bile acid level lower than, or equal to or higher than 102 $\mu\text{mol/L}$ . Log-rank test. *siEHC* (*surgical interruption of the enterohepatic circulation*).

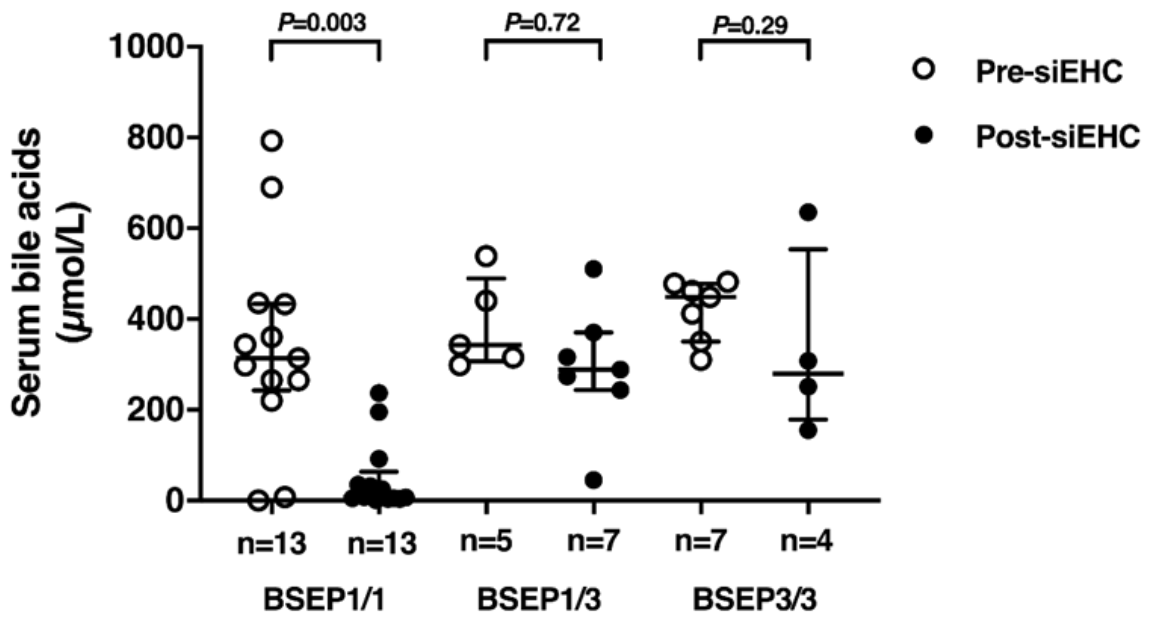

**Fig. S7. Serum bile acids prior to (open symbols) and after (closed symbols) surgical biliary diversion.** In (unpaired) patients with a BSEP1/1, BSEP1/3 or BSEP3/3 genotype. Wilcoxon signed-rank test. Bars represent median and IQR. *BSEP* (bile salt export pump); *siEHC* (surgical interruption of the enterohepatic circulation).



**Table S1. Overview of genetic BSEP categories**

| <b>BSEP category</b> | <b>BSEP subgroup</b> | <b>Genetic definition</b>                                                                                             |
|----------------------|----------------------|-----------------------------------------------------------------------------------------------------------------------|
| BSEP1                | BSEP1/1              | p.D482G or p.E297G on both alleles                                                                                    |
|                      | BSEP1/2              | p.D482G or p.E297G on one allele; missense mutation other than p.D482G or p.E297G on second allele                    |
|                      | BSEP1/3              | p.D482G or p.E297G on one allele; predicted protein truncating mutation on second allele                              |
| BSEP2                | BSEP2/2              | missense mutation other than p.D482G or p.E297G on both alleles                                                       |
|                      | BSEP2/3              | missense mutation other than p.D482G or p.E297G on one allele; predicted protein truncating mutation on second allele |
| BSEP3                | BSEP3/3              | predicted protein truncating mutation on both alleles                                                                 |

*BSEP (bile salt export pump).*

**Table S2. Genetic profile (i.e. mutations in *ABCB11* on first and second allele) and corresponding genotype severity allocation of the 138 included patients.**

|                | First allele           | Previous reports                                                                                                                                                                                                                                                                                                                          | Second allele                    | n         | Previous reports                                                                                                                                                                                                                                                                                                                          |
|----------------|------------------------|-------------------------------------------------------------------------------------------------------------------------------------------------------------------------------------------------------------------------------------------------------------------------------------------------------------------------------------------|----------------------------------|-----------|-------------------------------------------------------------------------------------------------------------------------------------------------------------------------------------------------------------------------------------------------------------------------------------------------------------------------------------------|
| <b>BSEP1/1</b> | <b>BSEP1</b>           |                                                                                                                                                                                                                                                                                                                                           | <b>BSEP1</b>                     | <b>31</b> |                                                                                                                                                                                                                                                                                                                                           |
|                | c.890A>G; p.Glu297Gly  | Van Wessel et al. J Hepatol 2020, Varma et al. Hepatology 2015, Davit-Spraul et al. Hepatology 2010, Pawlikowska et al. J Hepatol 2010, Strautnieks et al. Gastroenterology 2008                                                                                                                                                          | c.890A>G; p.Glu297Gly            | <b>19</b> | Van Wessel et al. J Hepatol 2020, Varma et al. Hepatology 2015, Davit-Spraul et al. Hepatology 2010, Pawlikowska et al. J Hepatol 2010, Strautnieks et al. Gastroenterology 2008                                                                                                                                                          |
|                | c.1445A>G; p.Asp482Gly | Van Wessel et al. J Hepatol 2020, Jankowska et al. J Pediatr Gastroenterol Nutr. 2016, Czubkowski et al. Ann Hepatol. 2015, Jankowska et al. J Pediatr Gastroenterol Nutr. 2014, Pawlikowska et al. J Hepatol 2010, Pawlikowska et al. J Hepatol 2010, Strautnieks et al. Gastroenterology 2008, Strautnieks et al. Gastroenterology 2008 | c.1445A>G; p.Asp482Gly           | <b>12</b> | Van Wessel et al. J Hepatol 2020, Jankowska et al. J Pediatr Gastroenterol Nutr. 2016, Czubkowski et al. Ann Hepatol. 2015, Jankowska et al. J Pediatr Gastroenterol Nutr. 2014, Pawlikowska et al. J Hepatol 2010, Pawlikowska et al. J Hepatol 2010, Strautnieks et al. Gastroenterology 2008, Strautnieks et al. Gastroenterology 2008 |
| <b>BSEP1/3</b> | <b>BSEP1</b>           |                                                                                                                                                                                                                                                                                                                                           | <b>BSEP3</b>                     | <b>30</b> |                                                                                                                                                                                                                                                                                                                                           |
|                | c.890A>G; p.Glu297Gly  |                                                                                                                                                                                                                                                                                                                                           | c.2906_17del; p.Lys969_Lys972del | <b>2</b>  | Van Wessel et al. J Hepatol 2020, Strautnieks et al.                                                                                                                                                                                                                                                                                      |

|  |                       |  |                                                               |   |                                                                                                                                                            |
|--|-----------------------|--|---------------------------------------------------------------|---|------------------------------------------------------------------------------------------------------------------------------------------------------------|
|  |                       |  |                                                               |   | Gastroenterology<br>2008                                                                                                                                   |
|  | c.890A_G; p.Glu297Gly |  | c.1583_1584delTA; p.Ile528SerfsTer21                          | 2 | Van Wessel et al. J<br>Hepatol 2020,<br>Strautnieks et al.<br>Gastroenterology<br>2008                                                                     |
|  | c.890A_G; p.Glu297Gly |  | c.611+1G>A; Splice site 3' intron 7                           | 2 | Van Wessel et al. J<br>Hepatol 2020,<br>Strautnieks et al.<br>Gastroenterology<br>2008                                                                     |
|  | c.890A>G; p.Glu297Gly |  | c.2012-8T>G; Splice site 3' Intron 16                         | 1 | Van Wessel et al. J<br>Hepatol 2020,<br>Grammatikopoulos et<br>al. J Pediatr<br>Gastroenterol Nutr<br>2015, Strautnieks et<br>al. Gastroenterology<br>2008 |
|  | c.890A_G; p.Glu297Gly |  | c.1826-1827dup; p.Ile610Gln fsX45<br>(p.Ile610GlnfsTer45)     | 1 | Van Wessel et al. J<br>Hepatol 2020, Davit-<br>Spraul et al.<br>Hepatology 2010                                                                            |
|  | c.890A_G; p.Glu297Gly |  | c.1435-17_1450dup33bp; p.His484ArgfsX5<br>(p.His484ArgfsTer5) | 1 | Van Wessel et al. J<br>Hepatol 2020, Davit-<br>Spraul et al.<br>Hepatology 2010                                                                            |
|  | c.890A>G; p.Glu297Gly |  | c.3904G>T; p.Glu1302X                                         | 1 | Van Wessel et al. J<br>Hepatol 2020,<br>Strautnieks et al.<br>Gastroenterology<br>2008                                                                     |
|  | c.890A>G; p.Glu297Gly |  | c.2343+1G>T; Splice site 5' intron 19                         | 1 | Van Wessel et al. J<br>Hepatol 2020,<br>Strautnieks et al.<br>Gastroenterology<br>2008                                                                     |
|  | c.890A_G; p.Glu297Gly |  | c.3268C>T, p.R1090X (p.Arg1090Ter)                            | 1 | Van Wessel et al. J<br>Hepatol 2020, Davit-<br>Spraul et al.<br>Hepatology 2010,<br>Strautnieks et al.<br>Gastroenterology<br>2008                         |

|  |                        |  |                                                       |   |                                                                                                                     |
|--|------------------------|--|-------------------------------------------------------|---|---------------------------------------------------------------------------------------------------------------------|
|  | c.890A_G; p.Glu297Gly  |  | c.1723C>T; p.Arg575X (p.Arg575Ter)                    | 1 | Van Wessel et al. J Hepatol 2020, Strautnieks et al. Nature Genetics 1998, Strautnieks et al. Gastroenterology 2008 |
|  | c.890A_G; p.Glu297Gly  |  | c.2343+1G>T; Splice site 5' intron 19                 | 1 | Van Wessel et al. J Hepatol 2020, Strautnieks et al. Gastroenterology 2008                                          |
|  | c.890A_G; p.Glu297Gly  |  | c.3491delT;p.Val1164Glyfs*7 (p.Val1164GlyfsTer7)      | 1 | Van Wessel et al. J Hepatol 2020, Strautnieks et al. Gastroenterology 2008                                          |
|  | c.890A_G; p.Glu297Gly  |  | c.3169C>T; p.Arg1057* (p.Arg1057Ter or R575X)         | 1 | Van Wessel et al. J Hepatol 2020, Liu et al. Liver Int. 2018, Strautnieks et al. Nature Genetics 1998               |
|  | c.890A_G; p.Glu297Gly  |  | c.541-546delAAAATC, K208-1209del (p.Arg181_Ile182del) | 1 | Van Wessel et al. J Hepatol 2020                                                                                    |
|  | c.890A_G; p.Glu297Gly  |  | c.1146_1166del; p.Phe383_Ala389del                    | 1 | Van Wessel et al. J Hepatol 2020                                                                                    |
|  | c.890A_G; p.Glu297Gly  |  | c.390G>T; p.G130G                                     | 1 | -                                                                                                                   |
|  | c.890A_G; p.Glu297Gly  |  | c.3945delC                                            | 1 | -                                                                                                                   |
|  | c.890A_G; p.Glu297Gly  |  | c.1966_1967delTT                                      | 1 | -                                                                                                                   |
|  | c.1445A>G; p.Asp482Gly |  | c.1558 A>T; p.Arg520X (p.Arg520Ter)                   | 2 | Van Wessel et al. J Hepatol 2020, Strautnieks et al. Gastroenterology 2008                                          |
|  | c.1445A>G; p.Asp482Gly |  | c.2343+1G>A; Splice site 5' intron 19                 | 2 | Van Wessel et al. J Hepatol 2020, Strautnieks et al. Gastroenterology 2008                                          |
|  | c.1445A>G; p.Asp482Gly |  | c.1198-1G>C; p.? Splice site                          | 1 | Van Wessel et al. J Hepatol 2020, Varma et al. Hepatology 2015                                                      |
|  | c.1445A>G; p.Asp482Gly |  | c.2178+1G>A; Splice site 5' Intron 18                 | 1 | Van Wessel et al. J Hepatol 2020,                                                                                   |

|                |                                    |                                                                                                                 |                                    |           |                                                                                                                 |
|----------------|------------------------------------|-----------------------------------------------------------------------------------------------------------------|------------------------------------|-----------|-----------------------------------------------------------------------------------------------------------------|
|                |                                    |                                                                                                                 |                                    |           | Strautnieks et al. Gastroenterology 2008                                                                        |
|                | c.1445A>G; p.Asp482Gly             |                                                                                                                 | c.908 +1 G>T; p.? Splice site      | 1         | Van Wessel et al. J Hepatol 2020, Strautnieks et al. Gastroenterology 2008                                      |
|                | c.1445A>G; p.Asp482Gly             |                                                                                                                 | c.1081 C>T p.Gln361                | 1         | -                                                                                                               |
|                | c.1445A>G; p.Asp482Gly             |                                                                                                                 | c.3804delG                         | 1         | -                                                                                                               |
| <b>BSEP3/3</b> | <b>BSEP3</b>                       |                                                                                                                 | <b>BSEP3</b>                       | <b>77</b> | <b>Missing 1</b>                                                                                                |
|                | c.1062T>A;p.Tyr354X                | Van Wessel et al. J Hepatol 2020, Van Wessel et al. J Hepatol 2020, Davit-Spraul et al. Hepatology 2010         | c.1062T>A;p.Tyr354X                | 7         | Van Wessel et al. J Hepatol 2020, Davit-Spraul et al. Hepatology 2010                                           |
|                | c.379delA; p.Thr127HisfsX6         | Van Wessel et al. J Hepatol 2020, Shagrani et al. Clin Genet 2017, Strautnieks et al. Gastroenterology 2008     | c.379delA; p.Thr127HisfsX6         | 7         | Van Wessel et al. J Hepatol 2020, Shagrani et al. Clin Genet 2017, Strautnieks et al. Gastroenterology 2008     |
|                | c.3904G>T; p.Glu1302Ter (p.E1302*) | Van Wessel et al. J Hepatol 2020, Strautnieks et al. Gastroenterology 2008                                      | c.3904G>T; p.Glu1302Ter (p.E1302*) | 5         | Van Wessel et al. J Hepatol 2020, Strautnieks et al. Gastroenterology 2008                                      |
|                | c.1243C>T; p.Arg415X (R415X)       | Van Wessel et al. J Hepatol 2020, Liu et al. Liver Int. 2018, Davit-Spraul et al. Hepatology 2010               | c.1243C>T; p.Arg415X (R415X)       | 2         | Van Wessel et al. J Hepatol 2020, Liu et al. Liver Int. 2018, Davit-Spraul et al. Hepatology 2010               |
|                | c.3268C>T; p.R1090X                | Van Wessel et al. J Hepatol 2020, Davit-Spraul et al. Hepatology 2010, Strautnieks et al. Gastroenterology 2008 | c.3268C>T; p.R1090X                | 2         | Van Wessel et al. J Hepatol 2020, Davit-Spraul et al. Hepatology 2010, Strautnieks et al. Gastroenterology 2008 |
|                | c.3213+1delG; p.Asp1072ThrfsX25    | Van Wessel et al. J Hepatol 2020, Strautnieks et al.                                                            | c.3213+1delG; p.Asp1072ThrfsX25    | 2         | Van Wessel et al. J Hepatol 2020, Strautnieks et al.                                                            |

|  |                                      |                                                                                                                                                            |                                                        |   |                                                                                                                                        |
|--|--------------------------------------|------------------------------------------------------------------------------------------------------------------------------------------------------------|--------------------------------------------------------|---|----------------------------------------------------------------------------------------------------------------------------------------|
|  |                                      | Gastroenterology<br>2008                                                                                                                                   |                                                        |   | Gastroenterology<br>2008                                                                                                               |
|  | c.1062T>A; p.Tyr354X                 | Van Wessel et al. J<br>Hepatol 2020                                                                                                                        | c.2931delA;p.Ala978Profs*9                             | 2 | Van Wessel et al. J<br>Hepatol 2020                                                                                                    |
|  | c.3400>T; p.Gln1134Ter (exon 25)     | Van Wessel et al. J<br>Hepatol 2020                                                                                                                        | c.3400>T; p.Gln1134Ter (exon 25)                       | 2 | Van Wessel et al. J<br>Hepatol 2020                                                                                                    |
|  | c.1385T>C; p.J420T + ivs19 rearr     | -                                                                                                                                                          | c.1457T>C; p.V444A + c.3307del ATCA;<br>p.I1061fs1095X | 2 | Dröge et al. J Hepatol.<br>2017                                                                                                        |
|  | c.1639-2A>C                          | -                                                                                                                                                          | c.1639-2A>C                                            | 2 | -                                                                                                                                      |
|  | c.145C>T; p.Gln49X                   | Van Wessel et al. J<br>Hepatol 2020, Liu et<br>al. Liver Int. 2018                                                                                         | c.908+5G>A                                             | 1 | Van Wessel et al. J<br>Hepatol 2020, Wang<br>et al. Pediatr Res 2019,<br>Liu et al. Liver Int<br>2018, Wang et al.<br>Hepatol Res 2018 |
|  | c.2012-8T>G splice site 3' Intron 16 | Van Wessel et al. J<br>Hepatol 2020,<br>Grammatikopoulos et<br>al. J Pediatr<br>Gastroenterol Nutr<br>2015, Strautnieks et<br>al. Gastroenterology<br>2008 | c.1941delA; p.Gly648ValfsX6                            | 1 | Van Wessel et al. J<br>Hepatol 2020,<br>Strautnieks et al.<br>Gastroenterology<br>2008                                                 |
|  | c.2012-8T>G splice site 3' Intron 16 | Van Wessel et al. J<br>Hepatol 2020,<br>Grammatikopoulos et<br>al. J Pediatr<br>Gastroenterol Nutr<br>2015, Strautnieks et<br>al. Gastroenterology<br>2008 | c.1146_1166del;p.Phe383_Ala389del                      | 1 | Van Wessel et al. J<br>Hepatol 2020                                                                                                    |
|  | c.2012-8T>G splice site 3' Intron 16 | Van Wessel et al. J<br>Hepatol 2020,<br>Grammatikopoulos et<br>al. J Pediatr<br>Gastroenterol Nutr<br>2015, Strautnieks et<br>al. Gastroenterology<br>2008 | c.1142_1162 del                                        | 1 | Van Wessel et al. J<br>Hepatol 2020,<br>Grammatikopoulos et<br>al. J Pediatr<br>Gastroenterol Nutr<br>2015                             |
|  | c.1408C>T; p.Arg470Ter (p.R470*)     | Van Wessel et al. J<br>Hepatol 2020, Davit-<br>Spraul et al. JIMD Rep<br>2014                                                                              | c.1941delA; p.Gly648Valfs*6                            | 1 | Van Wessel et al. J<br>Hepatol 2020,<br>Strautnieks et al.<br>Gastroenterology<br>2008                                                 |

|  |                                        |                                                                                                       |                                                     |   |                                                                                                       |
|--|----------------------------------------|-------------------------------------------------------------------------------------------------------|-----------------------------------------------------|---|-------------------------------------------------------------------------------------------------------|
|  | c.1308+2T>A; Splicing                  | Van Wessel et al. J Hepatol 2020                                                                      | c.1408C>T; p.Arg470Ter (p.R470*)                    | 1 | Van Wessel et al. J Hepatol 2020, Davit-Spraul et a. JIMD Rep 2014                                    |
|  | c.3213+5G>A                            | Van Wessel et al. J Hepatol 2020                                                                      | c.3575delC; p.Ala1192GlufsTer51 (p.Ala1192GlufsX51) | 1 | Van Wessel et al. J Hepatol 2020, Davit-Spraul et al. Hepatology 2010                                 |
|  | IVS17 + 1T>A; Splicing                 | Van Wessel et al. J Hepatol 2020, Jara et al. N Engl J Med 2009                                       | IVS17 + 1T>A; Splicing                              | 1 | Van Wessel et al. J Hepatol 2020, Jara et al. N Engl J Med 2009                                       |
|  | c.2611-2 A>T; Splice site 3' intron 22 | Van Wessel et al. J Hepatol 2020, Strautnieks et al. Gastroenterology 2008                            | c.2611-2 A>T; Splice site 3' intron 22              | 1 | Van Wessel et al. J Hepatol 2020, Strautnieks et al. Gastroenterology 2008                            |
|  | c.3904G>T; p.Glu1302X                  | Van Wessel et al. J Hepatol 2020, Strautnieks et al. Gastroenterology 2008                            | c.2178+1G>A; Splice site 5' Intron 18               | 1 | Van Wessel et al. J Hepatol 2020, Strautnieks et al. Gastroenterology 2008                            |
|  | c.3169C>T; p.Arg1057X                  | Van Wessel et al. J Hepatol 2020, Liu et al. Liver Int. 2018, Strautnieks et al. Nature Genetics 1998 | c.3169C>T; p.Arg1057X                               | 1 | Van Wessel et al. J Hepatol 2020, Liu et al. Liver Int. 2018, Strautnieks et al. Nature Genetics 1998 |
|  | c.2178+1G>A; Splice site 5' Intron 18  | Van Wessel et al. J Hepatol 2020, Strautnieks et al. Gastroenterology 2008                            | c.2178+1G>A; Splice site 5' Intron 18               | 1 | Van Wessel et al. J Hepatol 2020, Strautnieks et al. Gastroenterology 2008                            |
|  | c.1792C>T; p.Gln598Ter (p.Q598*)       | Van Wessel et al. J Hepatol 2020                                                                      | c.1792C>T; p.Gln598Ter (p.Q598*)                    | 1 | Van Wessel et al. J Hepatol 2020                                                                      |
|  | c.150+3A>G; Splice site 3' intron 4    | Van Wessel et al. J Hepatol 2020                                                                      | c.150+3A>G; Splice site 3' intron 4                 | 1 | Van Wessel et al. J Hepatol 2020                                                                      |
|  | c.1489C>T; p.Qln497X                   | Van Wessel et al. J Hepatol 2020, Liu et al. Liver Int. 2018                                          | c.2197C>T; p.Qln733X                                | 1 | Van Wessel et al. J Hepatol 2020, Liu et al. Liver Int. 2018                                          |
|  | c.145C>T; p.Gln49X                     | Van Wessel et al. J Hepatol 2020                                                                      | c.3169C?T; p.Arg1057X                               | 1 | Van Wessel et al. J Hepatol 2020, Liu et al. Liver Int. 2018, Strautnieks et al. Nature Genetics 1998 |
|  | c.1416T>C; p.Y472* (p.Tyr472Ter)       | Van Wessel et al. J Hepatol. 2020,                                                                    | c.1416T>C; p.Y472* (p.Tyr472Ter)                    | 1 | Van Wessel et al. J Hepatol 2020,                                                                     |

|  |                                                         |                                                                                                                     |                                                         |   |                                                                                                                     |
|--|---------------------------------------------------------|---------------------------------------------------------------------------------------------------------------------|---------------------------------------------------------|---|---------------------------------------------------------------------------------------------------------------------|
|  |                                                         | Strautnieks et al. Gastroenterology 2008                                                                            |                                                         |   | Strautnieks et al. Gastroenterology 2008                                                                            |
|  | c.1723C>T; p.R575X                                      | Van Wessel et al. J Hepatol 2020, Strautnieks et al. Gastroenterology 2008, Strautnieks et al. Nature Genetics 1998 | c.2178+1G>T; Splice site 5' Intron 18                   | 1 | Van Wessel et al. J Hepatol 2020, Strautnieks et al. Gastroenterology 2008                                          |
|  | c.1723C>T; P.Arg575X                                    | Van Wessel et al. J Hepatol 2020, Strautnieks et al. Nature Genetics 1998, Strautnieks et al. Gastroenterology 2008 | c.1723C>T; P.Arg575X                                    | 1 | Van Wessel et al. J Hepatol 2020, Strautnieks et al. Gastroenterology 2008, Strautnieks et al. Nature Genetics 1998 |
|  | c.2787_2788insGAGAT; p.k930EfsX79 + c.3457C>T; p.R1153C | Liu et al. Liver Int. 2018, Strautnieks et al. Gastroenterology 2008, Strautnieks et al. Nature Genetics 1998       | c.2787_2788insGAGAT; p.k930EfsX79 + c.3457C>T; p.R1153C | 1 | Liu et al. Liver Int. 2018, Strautnieks et al. Gastroenterology 2008, Strautnieks et al. Nature Genetics 1998       |
|  | c.1197+1G>T; Splicing                                   | Van Wessel et al. J Hepatol 2020                                                                                    | c.1197+1G>T; Splicing                                   | 1 | Van Wessel et al. J Hepatol 2020                                                                                    |
|  | 743-745 delTTA; p.Ile206del (I206del)                   | Van Wessel et al. J Hepatol 2020                                                                                    | 743-745 delTTA; p.Ile206del (I206del)                   | 1 | Van Wessel et al. J Hepatol 2020                                                                                    |
|  | c.1826_1827dupCA;p.IleGlnfs*45                          | Van Wessel et al. J Hepatol 2020                                                                                    | c.1826_1827dupCA;p.IleGlnfs*45                          | 1 | Van Wessel et al. J Hepatol 2020                                                                                    |
|  | Duplication exons 14-28                                 | Van Wessel et al. J Hepatol 2020                                                                                    | c.2177_2178+1delAGGinsGT                                | 1 | Van Wessel et al. J Hepatol 2020                                                                                    |
|  | Deletion exons 6-9                                      | Van Wessel et al. J Hepatol 2020                                                                                    | Deletion exons 6-9                                      | 1 | Van Wessel et al. J Hepatol 2020                                                                                    |
|  | c.2T>A; p.Met1?                                         | Van Wessel et al. J Hepatol 2020                                                                                    | c.2T>A; p.Met1?                                         | 1 | Van Wessel et al. J Hepatol 2020                                                                                    |
|  | c.2692del; p.Trp898Gly                                  | Van Wessel et al. J Hepatol 2020                                                                                    | c.2692del; p.Trp898Gly                                  | 1 | Van Wessel et al. J Hepatol 2020                                                                                    |
|  | c.3945delC                                              | -                                                                                                                   | c.1408C>T; p.Arg470Ter (p.R470*)                        | 1 | Van Wessel et al. J Hepatol 2020, Davit-Spraul et al. JIMD Rep 2014                                                 |
|  | c.2319dupC                                              | -                                                                                                                   | c.1146_1166del;p.Phe383_Ala389del                       | 1 | Van Wessel et al. J Hepatol 2020                                                                                    |
|  | c.2178+1G>A; Splice site 5' Intron 18                   | Van Wessel et al. J Hepatol 2020,                                                                                   | c.389+8G>A                                              | 1 | -                                                                                                                   |



|                                                                                                 |                                                 |                                                                                        |                                                 |   |   |
|-------------------------------------------------------------------------------------------------|-------------------------------------------------|----------------------------------------------------------------------------------------|-------------------------------------------------|---|---|
|                                                                                                 |                                                 | Strautnieks et al.<br>Gastroenterology<br>2008                                         |                                                 |   |   |
|                                                                                                 | c.611 + 1G>A; Splice site 3' intron 7           | Van Wessel et al. J<br>Hepatol 2020,<br>Strautnieks et al.<br>Gastroenterology<br>2008 | c.1881 dupT, p.splice, G628*                    | 1 | - |
|                                                                                                 | c.409G>T                                        | Liu et al. Liver Int.<br>2018                                                          | c.2542delG                                      | 1 | - |
|                                                                                                 | c.2327delT; p.Leu776Stop                        | -                                                                                      | c.2327delT; p.Leu776Stop                        | 1 | - |
|                                                                                                 | c.3174delA; p.Gln1058fsX<br>(p.Gln1058Hlsfs'39) | -                                                                                      | c.3174delA; p.Gln1058fsX<br>(p.Gln1058Hlsfs'39) | 1 | - |
|                                                                                                 | c.2380C>T; p.Q794X                              | -                                                                                      | c.2380C>T; p.Q794X                              | 1 | - |
|                                                                                                 | c.989G>A; p.Trp330Ter                           | -                                                                                      | c.989G>A; p.Trp330Ter                           | 1 | - |
|                                                                                                 | c.2115C>A; p.Tyr705Ter                          | -                                                                                      | c.2115C>A; p.Tyr705Ter                          | 1 | - |
|                                                                                                 | c.1810-3C>G                                     | -                                                                                      | c.1810-3C>G                                     | 1 | - |
|                                                                                                 | c.3586C>T                                       | -                                                                                      | c.3586C>T                                       | 1 | - |
|                                                                                                 | c.1271delA                                      | -                                                                                      | c.22C>T                                         | 1 | - |
|                                                                                                 | c.1827insCA; p.Ile610Glnfs*45                   | -                                                                                      | c.1827insCA; p.Ile610Glnfs*45                   | 1 | - |
|                                                                                                 | g.24774-42062del                                | -                                                                                      | g.24774-42062del                                | 1 | - |
|                                                                                                 | Deletion of exon 9                              | -                                                                                      | Deletion of exon 9                              | 1 | - |
|                                                                                                 | Deletion of exons 15-17                         | -                                                                                      | Deletion of exons 15-17                         | 1 | - |
| <i>BSEP (bile salt export pump).</i><br><i>Adapted from van Wessel et. al. J Hepatol. 2020.</i> |                                                 |                                                                                        |                                                 |   |   |

**Table S3. Indication for liver transplantation per BSEP category**

|                                    | <b>BSEP1/1<br/>(n=7/31)</b> | <b>BSEP1/3<br/>(n=20/30)</b> | <b>BSEP3/3<br/>(n=39/77)</b> |
|------------------------------------|-----------------------------|------------------------------|------------------------------|
| <b>Pruritus</b>                    | 2                           | 12                           | 10                           |
| <b>End-stage liver<br/>disease</b> | 4                           | 8                            | 23                           |
| <b>HCC</b>                         | 1                           | 0                            | 4                            |
| <b>Other</b>                       | 0                           | 0                            | 2                            |

*BSEP (bile salt export pump); HCC (hepatocellular carcinoma); n (number).*
